# Supplementary material
Source: MDPI journal article supplement (https://www.mdpi.com/2624-6511/6/6/139)
Supplement: s1 [file s1]

# An Urban Acoustic Rainfall Estimation Technique Using CNN Inversion Approach for Potential Smart City Applications

Mohammed I.I. Alkhatib <sup>1</sup>, Amin Talei <sup>\*,1</sup>, Tak Kwin Chang <sup>1</sup>, Valentijn R.N. Pauwels <sup>2</sup>, Ming Fai Chowa<sup>1</sup>

<sup>1</sup> Department of Civil Engineering, School of Engineering, Monash University Malaysia, Jalan Lagoon Selatan, 47500 Bandar Sunway, Selangor, Malaysia.

<sup>2</sup> Department of Civil Engineering, Monash University, Clayton, Victoria, Australia.

\* Corresponding author. E-mail address: amin.talei@monash.edu

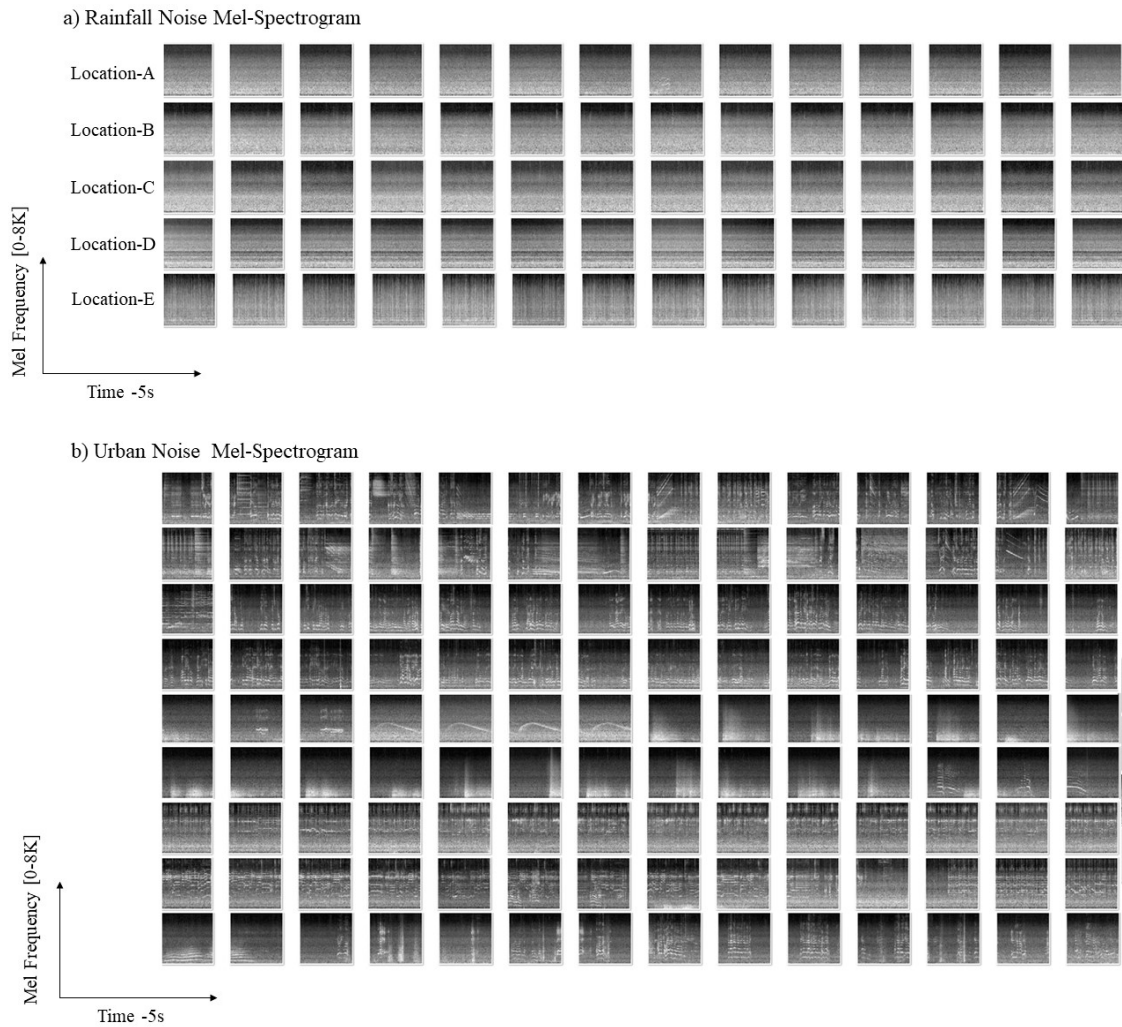

**Figure S1: Sample of 5s log-Mel spectrogram of (a) rainfall recordings from the five environments and (b) different urban noises during rainfall.**
