# Supplementary material
Source: MDPI journal article supplement (https://www.mdpi.com/2624-6511/6/6/139)
Supplement: s1 [file s1]

Archive with 1 entries (1 files):
- smartcities-2681636-supplementary.pdf
